# Supplementary material
Source: MDPI journal article supplement (https://www.mdpi.com/2072-4292/13/17/3403)
Supplement: s1 [file s1 › remotesensing-1299030-supplementary.pdf]

## SUPPLEMENTARY MATERIALS

### List S1: Keywords used for Preliminary Research – in English, Dutch and Malay

|                            |                            |
|----------------------------|----------------------------|
| Asia                       | Mangrove Malay             |
| Api-Api                    | Mangrove Malay Peninsula   |
| Bakau                      | Mangrove Malaya            |
| Boom                       | Mangrove Malaysia          |
| Broek                      | Marsh                      |
| Dindings                   | Matang                     |
| Drasland                   | Melaka                     |
| Dutch East Indian Company  | Modder                     |
| East-Indies                | Modderpoel                 |
| Federated Malay States     | Moeras                     |
| Federation on Malaya       | Oost-Indie                 |
| Forest                     | Oost-Indische              |
| Habitat Malay              | Oost-Indischen Archipelago |
| Habitat Malaya             | Paya                       |
| Habitat Malaysia           | Paya Bakau                 |
| Hutan                      | Penang                     |
| Hutan Bakau                | Perak                      |
| Johore                     | Pinwortels                 |
| Kedah                      | Province Wellesley         |
| Kedah                      | Pulau Pinang               |
| Kelantan                   | Pulo Penang                |
| Land Cover Malay           | Pulo Pinang                |
| Land Cover Malay Peninsula | Salangore                  |
| Land Cover Malaya          | Selangore                  |
| Land Cover Malaysia        | Selat Melaka               |
| Land Use                   | Singapore                  |
| Lumpur                     | Singapura                  |
| Malaca                     | Steltenboom                |
| Malacca                    | Straits Of Malacca         |
| Malacca Straits            | Straits Settlements        |
| Malaka                     | Southeast Asia             |
| Malakka                    | South East Asia            |
| Malay                      | Swamp                      |
| Malay Federation           | Tanah Melayu               |
| Malay Peninsula            | Topography Malay Peninsula |
| Malay Peninsular           | Topography Malaya          |
| Malaya                     | Trengganu                  |
| Malayan                    | Unfederated Malay States   |
| Malaysia                   | Vegetation Malay           |
| Maleisie                   | Vegetation Malay Peninsula |
| Manggi                     | Vegetation Malaya          |
| Manggi-Manggi              | Vegetation Malaysia        |
| Mangrove                   | Wortelboom                 |

**Table S1: List of Landsat Images Used Each Year for 1988, 1992, 2022, 2012 and 2018**  
**(all products listed here are courtesy of the U.S. Geological Survey).**

| <b>Year</b> | <b>Landsat Type</b> | <b>Images Used</b>                                                                                                                                                                                                                                                                                                                                                                                                                                                                                                                                                                                                                   |
|-------------|---------------------|--------------------------------------------------------------------------------------------------------------------------------------------------------------------------------------------------------------------------------------------------------------------------------------------------------------------------------------------------------------------------------------------------------------------------------------------------------------------------------------------------------------------------------------------------------------------------------------------------------------------------------------|
| <b>1988</b> | Landsat 5           | LT05_L1GS_125058_19880403_20170209_01_T2<br>LT05_L1GS_129056_19881211_20170205_01_T2<br>LT05_L1TP_125059_19880318_20170209_01_T2<br>LT05_L1TP_126056_19880731_20170208_01_T1<br>LT05_L1TP_126057_19880731_20170208_01_T1<br>LT05_L1TP_126058_19880731_20170208_01_T1<br>LT05_L1TP_126059_19881222_20170205_01_T1<br>LT05_L1TP_127056_19880807_20170207_01_T1<br>LT05_L1TP_127057_19881127_20170205_01_T1<br>LT05_L1TP_127058_19880417_20170209_01_T1<br>LT05_L1TP_128055_19880220_20170209_01_T1<br>LT05_L1TP_128056_19880220_20170209_01_T1<br>LT05_L1TP_128057_19881204_20170205_01_T1<br>LT05_L1TP_129055_19880227_20170209_01_T1 |
| <b>1992</b> | Landsat 5           | LT05_L1TP_125058_19920921_20170122_01_T1<br>LT05_L1TP_125059_19920703_20170123_01_T1<br>LT05_L1TP_126056_19921030_20170121_01_T1<br>LT05_L1TP_126057_19920726_20170123_01_T1<br>LT05_L1TP_126058_19920421_20170123_01_T1<br>LT05_L1TP_126059_19920304_20170124_01_T1<br>LT05_L1TP_127056_19920802_20170122_01_T1<br>LT05_L1TP_127057_19920802_20170122_01_T1<br>LT05_L1TP_127058_19921224_20170120_01_T1<br>LT05_L1TP_128055_19920606_20170123_01_T1<br>LT05_L1TP_128056_19921231_20170121_01_T1<br>LT05_L1TP_128057_19920130_20170123_01_T1<br>LT05_L1TP_129055_19920410_20170123_01_T1<br>LT05_L1TP_129056_19930413_20170119_01_T1 |
| <b>2002</b> | Landsat 7           | LE07_L1TP_125058_20020723_20170128_01_T1<br>LE07_L1TP_125059_20020402_20170131_01_T1<br>LE07_L1TP_126056_20021018_20170128_01_T1<br>LE07_L1TP_126057_20021018_20170127_01_T1<br>LE07_L1TP_126058_20021002_20170129_01_T1<br>LE07_L1TP_126059_20020714_20170129_01_T1<br>LE07_L1TP_127056_20020907_20170129_01_T1<br>LE07_L1TP_127057_20021025_20170127_01_T1<br>LE07_L1TP_127058_20021110_20170129_01_T1<br>LE07_L1TP_128055_20020306_20170131_01_T1<br>LE07_L1TP_128056_20020306_20170131_01_T1<br>LE07_L1TP_128057_20021016_20170127_01_T1<br>LE07_L1TP_129055_20020719_20170130_01_T1<br>LE07_L1TP_129056_20020225_20170131_01_T1 |

| Year | Landsat Type | Images Used                                                                                                                                                                                                                                                                                                                                                                                                                                                                                                                                                                                                                          |
|------|--------------|--------------------------------------------------------------------------------------------------------------------------------------------------------------------------------------------------------------------------------------------------------------------------------------------------------------------------------------------------------------------------------------------------------------------------------------------------------------------------------------------------------------------------------------------------------------------------------------------------------------------------------------|
| 2012 | Landsat 7    | LE07_L1TP_125058_20120616_20161130_01_T1<br>LE07_L1TP_125059_20120413_20161202_01_T1<br>LE07_L1TP_126056_20120623_20161201_01_T1<br>LE07_L1TP_126057_20120623_20161201_01_T1<br>LE07_L1TP_126058_20120810_20161129_01_T1<br>LE07_L1TP_126059_20120623_20161130_01_T1<br>LE07_L1TP_127056_20120614_20161202_01_T1<br>LE07_L1TP_127057_20120614_20161130_01_T1<br>LE07_L1TP_127058_20120223_20161202_01_T1<br>LE07_L1TP_128055_20121027_20161127_01_T1<br>LE07_L1TP_128056_20121011_20161128_01_T1<br>LE07_L1TP_128057_20121011_20161128_01_T1<br>LE07_L1TP_129055_20120324_20161203_01_T1<br>LE07_L1TP_129056_20120324_20161202_01_T1 |
| 2018 | Landsat 8    | LC08_L1TP_125058_20180727_20180731_01_T1<br>LC08_L1TP_125059_20180524_20180605_01_T1<br>LC08_L1TP_126056_20181022_20181031_01_T1<br>LC08_L1TP_126057_20180803_20180814_01_T1<br>LC08_L1TP_126058_20180920_20180928_01_T1<br>LC08_L1TP_126059_20180413_20180417_01_T1<br>LC08_L1TP_127056_20180725_20180731_01_T1<br>LC08_L1TP_127057_20180319_20180403_01_T1<br>LC08_L1TP_127058_20180404_20180417_01_T1<br>LC08_L1TP_128055_20181223_20181227_01_T1<br>LC08_L1TP_128056_20181223_20181227_01_T1<br>LC08_L1TP_128057_20180630_20180716_01_T1<br>LC08_L1TP_129055_20180621_20180703_01_T1<br>LC08_L1TP_129056_20181027_20181115_01_T1 |

**Table S2: Complete List of Primary Sources Obtained with Annotation or Delineated Mangrove Areas in Peninsular Malaysia**

| Record description                                                                                                                                                                                                                                                                                   | Information obtained                                                                                                 | Accession number                | Archive Information                                  |
|------------------------------------------------------------------------------------------------------------------------------------------------------------------------------------------------------------------------------------------------------------------------------------------------------|----------------------------------------------------------------------------------------------------------------------|---------------------------------|------------------------------------------------------|
| <b>Map of Prince of Wales' Island or Pulo Penang, and Province Wellesley, 1853</b> surveyed under the auspices of the Governor of Prince of Wales' Island. Singapore, and Malacca, including a careful survey of the South Channel made in 1853 by J. Moniot, Government Surveyor. 1 mile to 1 inch. | Mangrove annotation on mainland Penang.                                                                              | CO 700/StraitsSettlements6      | National Archives of United Kingdom                  |
| <b>Hand-drawn map of Langat District, 1874</b> in Sir Frank Swettenham's Malayan journals, 1874 – 1876 / edited by P.L. Burns and C.D. Cowan.                                                                                                                                                        | Annotation of “mangrove swamps” on Klang Islands, Selangor.                                                          | 959.5030924                     | Archive Library, National Archives of United Kingdom |
| <b>Map of the Malay Peninsula, 1879.</b> Met inzet van de stad Singapore.                                                                                                                                                                                                                            | Mangrove annotated as “Mangrove swamp” in Matang (Perak), and Sepang River (Selangor).                               | 4.MIKO, inventarisnummer 1 131A | The National Archives of The Netherlands             |
| <b>A Map of the Malay Peninsula, 1898</b> compiled by and published for the Straits Branch of the Royal Asiatic Society, Singapore. 8 miles to 1 inch.                                                                                                                                               | “Swampy islands covered with mangroves” denoted in Matang (Perak) and Manjung (previously known as Dindings) (Perak) | CO 700/StraitsSettlements31     | National Archives of United Kingdom                  |
| <b>Map of Perak, 1901.</b> Alfred E. Young, Chief Surveyor, Perak. 8 miles to 1 inch.                                                                                                                                                                                                                | Mangrove annotated in Matang (Perak).                                                                                | CO 700/StraitsSettlements35     | National Archives of United Kingdom                  |
| <b>Map of the Malay Peninsula, 1911</b> compiled by and published for the Straits Branch of the Royal Asiatic Society Singapore. Inset: Singapore Town                                                                                                                                               | Mangrove annotated in Matang (Perak) as “Swampy islands covered with mangroves”.                                     | CO 1047/884                     | National Archives of United Kingdom                  |
| <b>Penang Aerodome 1932</b>                                                                                                                                                                                                                                                                          | Mangrove annotated along                                                                                             | CO 1047/957                     | National Archives of United Kingdom                  |

| Record description                                                                                                                                                                                                                                                                  | Information obtained                                                             | Accession number               | Archive Information                                   |
|-------------------------------------------------------------------------------------------------------------------------------------------------------------------------------------------------------------------------------------------------------------------------------------|----------------------------------------------------------------------------------|--------------------------------|-------------------------------------------------------|
|                                                                                                                                                                                                                                                                                     | Nipah River on Penang Island.                                                    |                                |                                                       |
| <b>Aviation Map of Malaya 1935.</b> FMS Surveys 138                                                                                                                                                                                                                                 | Mangrove areas identified and annotated along west coast of Peninsular Malaysia. | CO 1047/957                    | National Archives of United Kingdom                   |
| <b>Escape and Evasion map. 1944.</b> Reverse: Sheet 44F. Geopolitical area: Siam, Malaya, Sumatra. Subject: International boundaries, roads, rail, drainage, contours                                                                                                               | Mangrove areas identified and annotated along west coast of Peninsular Malaysia. | WO 418/70/3                    | National Archives of United Kingdom                   |
| <b>Land Utilization Maps - Georgetown, Kota Bharu &amp; Singapore, 1943 – 1944.</b> Admiralty, Inter-service Topographical Department, and Ministry of Defence, joint Intelligence Bureau Library: Survey, Maps and Reports. Inter-Services Information Series. Malaya. Plans:1-30. | Delineated mangrove areas across Peninsular Malaysia.                            | WO 252/608                     | National Archives of United Kingdom<br>Archives of UK |
| <b>Forest Resources Map of Malaya, 1954</b>                                                                                                                                                                                                                                         | Delineated mangrove areas across Peninsular Malaysia.                            | hdl:1885/140842                | Australian National University                        |
| <b>Vegetation Map of Malaysia, 1958.</b> Samengesteld door C.G.G.J. van Steenis. Uitgave van de Unesco Humid Tropics Research Project, Groningen. 1 blad. Behoort bij Commentary on the vegetation map of Malaysia door Van Steenis.                                                | Mangrove areas identified across Peninsular Malaysia.                            | 4.MIKO, inventarisnummer 6 064 | The National Archives of The Netherlands              |

**Table S3: List of Secondary Sources (Personal journal, books, reports, etc.) with Mentions of Mangroves in Peninsular Malaysia**

| Texts on mangrove                                                                                                                                                                                                                                                                                                                                                                                                                                                                                                                                                                                                                                                                                                                                                                                                                                                                                                                                                                                                                                                                                                                                                                                                                                                                                                                                                                                                                                                                                                                                                                                                                       | Source & Accession No.                                                                                                               | Archive/Library              |
|-----------------------------------------------------------------------------------------------------------------------------------------------------------------------------------------------------------------------------------------------------------------------------------------------------------------------------------------------------------------------------------------------------------------------------------------------------------------------------------------------------------------------------------------------------------------------------------------------------------------------------------------------------------------------------------------------------------------------------------------------------------------------------------------------------------------------------------------------------------------------------------------------------------------------------------------------------------------------------------------------------------------------------------------------------------------------------------------------------------------------------------------------------------------------------------------------------------------------------------------------------------------------------------------------------------------------------------------------------------------------------------------------------------------------------------------------------------------------------------------------------------------------------------------------------------------------------------------------------------------------------------------|--------------------------------------------------------------------------------------------------------------------------------------|------------------------------|
| <p>The mangrove forests (or swamps) of the Malay Peninsula cover an area of about four hundred and thirty square miles, almost all on the west coast. On the west coast the mangrove belt is almost continuous from Kedah to Singapore.</p> <p>Mangrove swamps of the east coast are confined to the mouths of the rivers, the beaches being sandy and open, and generally free from gregarious tree growth other than casuarina.</p>                                                                                                                                                                                                                                                                                                                                                                                                                                                                                                                                                                                                                                                                                                                                                                                                                                                                                                                                                                                                                                                                                                                                                                                                   | <p>"Mangrove forests of the Malay Peninsula" by James Gilbert Watson<br/>1928</p> <p>634.9734209595 WAT MN</p>                       | National Library of Malaysia |
| <p>We are steaming over the incandescent sapphire sea among the mangrove-bordered islands which fringe the Selangor coast.</p> <p>At daylight we weighed anchor and steamed for many miles up the muddy, mangrove-fringed River Bernam, the mangrove occasionally varied by the nipah palm.</p> <p>We left Malacca at seven this morning in the small, unseaworthy, untrustworthy, unriggered steam launch Mosmee, and after crawling for some hours at a speed of about five miles an hour along brown and yellow shores with broad dark belt of palms above them, we left the waveless, burning sea behind, and after a few miles of torturous steaming through the mangrove swamps of the Linggi river, landed here to wait for sufficient water for the rest of our journey.</p> <p>This is a promontory covered with coco-palms, bananas, and small jungle growths. On either side are small rivers densely bordered by mangrove swamps. The first sight of a real mangrove swamp is an event. This mangi-mangi of the Malays (the Rhizophora mangil of botanists) has no beauty. All along this coast, within access of tidal waters, there is a belt of many miles in breadth, dense, impenetrable, from forty to fifty feet high, or as nearly level as may be, and of a dark, dull grey. At low water the mangroves are seen standing close packed along the shallow and muddy shores on cradles or erections of their own roots five or six feet high, but when these are covered at high tide they appear to be growing out of water. They send down roots from their branches, and all too quickly cover a large space.</p> | <p>"The leisure hour 1883: sketches in the Malay Peninsula" by Isabella L. Bird (Isabella Lucy)<br/>1883</p> <p>305.89923 BIR KP</p> | National Library of Malaysia |

| Texts on mangrove                                                                                                                                                                                                                                                                                                                                                                                                                                                                                                                                                                                                                                                                                                       | Source & Accession No.                                                                                                                                                      | Archive/Library                     |
|-------------------------------------------------------------------------------------------------------------------------------------------------------------------------------------------------------------------------------------------------------------------------------------------------------------------------------------------------------------------------------------------------------------------------------------------------------------------------------------------------------------------------------------------------------------------------------------------------------------------------------------------------------------------------------------------------------------------------|-----------------------------------------------------------------------------------------------------------------------------------------------------------------------------|-------------------------------------|
| ...The mangrove swamp is to me an evil mystery.                                                                                                                                                                                                                                                                                                                                                                                                                                                                                                                                                                                                                                                                         |                                                                                                                                                                             |                                     |
| ...entered the mouth of River Klang, two hundred miles from Singapore. Although this is the largest river in Selangore, it is only a hundred and fifty yards wide at the mouth. The water is brown and thick with mud, and looks bilious. The banks are low and swampy, and covered with mangroves and nipa palm growing in the soft mud.                                                                                                                                                                                                                                                                                                                                                                               | “The experiences of a hunter and naturalist in the Malay peninsula and Borneo” by William T. Hornaday (1854-1937)<br>1993<br><br>915.951 HOR M                              | National Library of Malaysia        |
| On the west coast the rivers have deposited large mud-flats, or mangrove swamps, and the last tidal reached of the rivers, before arriving at the sea, have their course through these flats.<br><br>On the east coast conditions are different. There are mangrove-swamps, for instance on the Kuantan river, but the coast is one long stretch of fine sandy beach, cooled by strong breezes...                                                                                                                                                                                                                                                                                                                       | “Handbook to British Malaya” by R.L. German<br>1935<br><br>915.951 GER MN                                                                                                   | National Library of Malaysia        |
| On the seaward fringe are the mangroves, also floristically richer than elsewhere in the tropics (Whitmore, 1984: 178). They are extensive along the west coast of the Peninsula and around the eastern, southern and western coasts of Borneo; most coasts facing the South China Sea are fringed with sand. These were the earliest forests to be used commercially, with silvicultural management, as important sources of both timber and charcoal. In recent years they have suffered most heavily from human impact, both for their wood and, by reclamation, for fish ponds and, on the inland sides, rice fields. Their value as breeding grounds for marine life has been greatly reduced by these incursions. | “In place of the forest: environmental and socio-economic transformation in Borneo and the eastern Malay Peninsula” by H. C Brookfield<br>1995<br><br>333.75137095983 BRO M | National Library of Malaysia        |
| III. Coast from Sungei Bakau to Sungei Larut<br><br>On this stretch of coast and for many miles south, there is almost continuous strip of mangrove forest, 7 miles wide in places.                                                                                                                                                                                                                                                                                                                                                                                                                                                                                                                                     | Special report on selected areas of the west coast.<br>1943<br><br>WO 252/1326                                                                                              | National Archives of United Kingdom |

| Texts on mangrove                                                                                                                                                                                                                                                                                                                                                                                                                                                                                                                                                                                                                                                                                                                                                                                                                                                                                                                           | Source & Accession No.                                                                                                                           | Archive/Library                            |
|---------------------------------------------------------------------------------------------------------------------------------------------------------------------------------------------------------------------------------------------------------------------------------------------------------------------------------------------------------------------------------------------------------------------------------------------------------------------------------------------------------------------------------------------------------------------------------------------------------------------------------------------------------------------------------------------------------------------------------------------------------------------------------------------------------------------------------------------------------------------------------------------------------------------------------------------|--------------------------------------------------------------------------------------------------------------------------------------------------|--------------------------------------------|
| <p>Two small streams, the Cherating and the Balok, meander across the swamp from the line of hills which limits it to the west. About the mouths of each of these streams is an area of mangrove swamps stretching for about 1 1/4 miles upstream from the coast.</p> <p>Just over 3 miles from its mouth the Kuantan is joined from the south by the Belat River. There is a belt of mangrove swamp extending up the Kuantan River for about 7 miles from its mouth, and for about 5 miles up the Belat River.</p>                                                                                                                                                                                                                                                                                                                                                                                                                         | <p>Air photography and topographical surveys<br/>Federation of Malaya</p> <p>OD 6/776</p>                                                        | <p>National Archives of United Kingdom</p> |
| <p>An overgrown strip of bog three miles wide and 27 long in the Tanjong Karang area between the Bernam and Selangor Rivers on the west coast 50 miles north of Port Swettenham has been reclaimed by a highly successful irrigation scheme and today provides a healthy community life where desolation and disease reigned.</p>                                                                                                                                                                                                                                                                                                                                                                                                                                                                                                                                                                                                           | <p>Malaya: 135 photographs compiled by the Central Office of Information depicting agriculture and food production.</p> <p>INF 10/206 PART 7</p> | <p>National Archives of United Kingdom</p> |
| <p><b>Mangrove Swamp Forest</b><br/>Mangrove and api are found all along the west coast of Malaya.</p> <p><b>Beach forests</b><br/>Where there are no mangroves, as along the east coast of Malaya, there is a narrow belt, rarely more than 20 to 100 yds. Wide, of beach forest. Note. There are small portions of the coastal area on which the nipah palm is found. These are usually muddy areas often associated with the landward side of mangrove swamp.</p> <p><b>Sub region: Perlis, NW Kedah and Langkawi Islands</b><br/>Natural vegetation and land utilization<br/>Mangrove swamp exists, with a few small breaks for the whole length of the coast. They reach inland in two small belts - on either side of the Perlis River for about 4 miles and on either side of the Jerlun River for about 2 miles.</p> <p><b>Langkawi Island</b><br/>About the tidal inlets on the east and north coast are expanses of mangrove.</p> | <p>General reports: topography, roads, towns and ports<br/>Aug 1943 - July 1945</p> <p>WO 252/606</p>                                            | <p>National Archives of United Kingdom</p> |

| Texts on mangrove                                                                                                                                                                                                                                                                                                                                                                                                                                                                                                                                                                                                                                                                                                                                                                                                                                                                                                                                                                               | Source & Accession No.                                                                                              | Archive/Library                     |
|-------------------------------------------------------------------------------------------------------------------------------------------------------------------------------------------------------------------------------------------------------------------------------------------------------------------------------------------------------------------------------------------------------------------------------------------------------------------------------------------------------------------------------------------------------------------------------------------------------------------------------------------------------------------------------------------------------------------------------------------------------------------------------------------------------------------------------------------------------------------------------------------------------------------------------------------------------------------------------------------------|---------------------------------------------------------------------------------------------------------------------|-------------------------------------|
| <p>There is a belt of mangrove swamp for about 3 miles up the Kedah River from the sea, and a little along the shore.</p> <p>Sub region 3: The Muda Sub region and Penang<br/>Coastal mangrove swamps are limited to the river mouths here. There is an extensive area of mangroves stretching inland on either side of the Merbok River for about 8 miles from the coast and with an average width of 4 miles. There are two strips 400-500 yds. wide on either bank of the Muda River for 2 miles from the sea. A narrow strip of mangrove swamp intermittently borders the Prai River for about 9 miles from its mouth. The lower 3 miles of the Juru River is bordered on either side by a narrow belt of mangrove swamp.</p> <p>Penang<br/>Mangrove swamp line the coast on the west from Batu Puteh to S.P Betong, varying in width from 200 yds. to 900yds. And on the east from the mouth of the Nibong River to the south of the nipah river, and extending up to the Relau River.</p> |                                                                                                                     |                                     |
| <p>Parit Buntar to Taiping<br/>About 5 miles west of Taiping there lies the huge Matang mangrove Forest reserve, some 25 miles in length, and varying in width from 4 to 8 miles.</p> <p>Taiping to Batu Gajah<br/>The broad mangrove belt in this section extends south to Sungei Tinggi.</p> <p>KL to Seremban<br/>For a few miles south of Port Swettenham-KL road are large rubber estates and tin mines. South of these, there is mangrove on the coast and a large area of flat swamp and jungle...<br/>South of road running eastwards from Telok Datok is another large area of flat swamp and jungle, including some Forests Reserve, and a great deal of mangrove near Sepang.</p> <p>Ayer Hitam to Singapore</p>                                                                                                                                                                                                                                                                     | <p>Coastal belt Alor Star to Singapore with particular reference to tank obstacles.<br/>1943</p> <p>WO 252/1327</p> | National Archives of United Kingdom |

| Texts on mangrove                                                                                                                                                                                                                                                                                                                                                                                                                                                                                                                                                                                                                                                                                                                                    | Source & Accession No.                                                                                                                                                                                       | Archive/Library                                              |
|------------------------------------------------------------------------------------------------------------------------------------------------------------------------------------------------------------------------------------------------------------------------------------------------------------------------------------------------------------------------------------------------------------------------------------------------------------------------------------------------------------------------------------------------------------------------------------------------------------------------------------------------------------------------------------------------------------------------------------------------------|--------------------------------------------------------------------------------------------------------------------------------------------------------------------------------------------------------------|--------------------------------------------------------------|
| Along the coast of Batu Pahat to Kukup there is a belt of small holdings... It is mostly low-lying and intersected with oreaka and the coast itself is fringed with mangrove.                                                                                                                                                                                                                                                                                                                                                                                                                                                                                                                                                                        |                                                                                                                                                                                                              |                                                              |
| <p>Exploitation of material resources</p> <p>Forests: The shipbuilding a programme and the charcoal industry have led to indiscriminate felling of Malaya's forest reserves, the former policy was to work forests so as to ensure a sustained yield but the Japanese have paid no heed to the felling cycle. the charcoal industry was a purely domestic one, but is capable of great expansion, should the Japanese go in for indiscriminate felling. Formerly charcoal was made principally from mangrove wood, but to feed her iron furnaces it may be necessary for Japan to use inland wood as well, unless she ignores the risk of erosion to the low-lying west coast agricultural lands by indiscriminate felling of the mangrove belt.</p> | <p>Inlichtingenrapporten.<br/>1942-1946</p> <p>2.12.37 Inventarsari number<br/>301</p>                                                                                                                       | The National Archives of The Netherlands                     |
| In the Dindings about 1,200 acres of the Tanjong Burong Reserve were given up for Padi cultivation, the Mangrove Forest on the area being cut under licence in the ordinary way before cultivation takes place. To compensate for this a block of Mangrove Forest near Batu Undan was added, Teluk Senangin Reserve is shewn for the first time in the report.                                                                                                                                                                                                                                                                                                                                                                                       | <p>Annual Report on Forest Administration in the Straits Settlements for the year 1903</p> <p><a href="https://doi.org/10.5962/bhl.title.137878">doi.org/10.5962/bhl.title.137878</a></p>                    | Biodiversity Heritage Library, Singapore (Online repository) |
| The only mangrove forest are in Singapore and the Dindings and these with those of Perak State (which alone are estimated to yield \$280,000 worth of fuel a year supply Railways, local Steamers, Smelting Works and other industries.                                                                                                                                                                                                                                                                                                                                                                                                                                                                                                              | <p>"Report on the Present System of Forest Conservancy in the Straits Settlements" by H. C. Hill<br/>1900</p> <p><a href="https://doi.org/10.5962/bhl.title.137878">doi.org/10.5962/bhl.title.137878</a></p> | Biodiversity Heritage Library, Singapore (Online repository) |
